# Supplementary material for: Proteomic analysis of the spineless cuttlefish Sepiella japonica: exploratory analyses on the phenomenon of death after spawning
Source: Research Square preprint supplement (doi:10.21203/rs.3.rs-155588/v2), 2022-04-29
Supplement: Supplementary file 1 [file 316a8e5bb867df792c5ee878.xlsx]

## Sheet: Sheet1
Accession	Group_A.average	Group_B.average	Group_C.average	KO	ko	ko description
CL1080.Contig1_All	3.49751e+08	6.03081e+08	158535997	K00505	ko00350	Tyrosine metabolism
CL1080.Contig2_All	8.30413e+08	1543445594	4.47758e+08	-	-	-
CL1080.Contig3_All	1621856458	3551847035	9.06443e+08	-	-	-
CL1124.Contig2_All	1.61651e+08	8.29001e+07	9.09709e+07	K12741	ko03040	Spliceosome
CL1523.Contig1_All	5.18325e+07	7.69254e+07	4.80467e+07	K09565	ko04020	Calcium signaling pathway
CL1770.Contig2_All	3.81627e+08	4.08024e+08	4.3302e+08	K00134	ko01200;ko01230;ko00010	Carbon metabolism;Biosynthesis of amino acids;Glycolysis / Gluconeogenesis
CL1780.Contig2_All	1.49231e+08	1.01309e+08	9.16844e+07	K02183	ko04070	Phosphatidylinositol signaling system
CL213.Contig1_All	5.27981e+07	3.54357e+07	5.6799e+07	-	-	-
CL2157.Contig1_All	229178694	2.55781e+08	3.23649e+08	K07374	ko04145	Phagosome
CL2223.Contig1_All	7.98024e+07	6.08362e+07	6.78176e+07	-	-	-
CL2294.Contig1_All	1.83883e+08	118282716	1.23015e+08	K02183	ko04070	Phosphatidylinositol signaling system
CL2643.Contig2_All	1.34562e+08	1.9376e+08	373946515	K00933	ko00330	Arginine and proline metabolism
CL2662.Contig1_All	1.04882e+08	8.04426e+07	1.01375e+08	K00940	ko00230;ko00240	Purine metabolism;Pyrimidine metabolism
CL2934.Contig1_All	120036014	8.50768e+07	1.24119e+08	-	-	-
CL2987.Contig1_All	1.43319e+08	1.38117e+08	1.67821e+08	K06630	ko04110;ko04114	Cell cycle;Oocyte meiosis
CL3100.Contig5_All	5.13775e+07	3.50135e+07	4.48397e+07	-	-	-
CL3329.Contig4_All	8.49528e+07	8.2882e+07	8.86266e+07	K03283	ko03040;ko04141;ko04144	Spliceosome;Protein processing in endoplasmic reticulum;Endocytosis
CL3565.Contig8_All	1.72662e+08	1.684e+08	2.23872e+08	K01464	ko00240;ko00410;ko00770;ko00983	Pyrimidine metabolism;beta-Alanine metabolism;Pantothenate and CoA biosynthesis;Drug metabolism - other enzymes
CL3683.Contig1_All	3.17867e+08	253971897	4.57627e+08	K02133	ko00190	Oxidative phosphorylation
CL3884.Contig2_All	7.65753e+07	3.97683e+07	4.80237e+07	K08057	ko04141;ko04145	Protein processing in endoplasmic reticulum;Phagosome
CL3967.Contig1_All	5.26082e+07	4.90727e+07	5.82692e+07	K05765	ko04810	Regulation of actin cytoskeleton
CL4025.Contig6_All	1.11185e+08	6.88699e+07	8.92008e+07	-	-	-
CL4466.Contig3_All	170218226	8.76028e+07	9.38393e+07	K09580	ko04141	Protein processing in endoplasmic reticulum
CL4998.Contig1_All	7.10259e+07	4.73639e+07	7.56159e+07	K07375	ko04145	Phagosome
CL5499.Contig1_All	3.4177e+08	4.24295e+08	2.49989e+08	-	-	-
CL5529.Contig1_All	1.58928e+08	4.25274e+07	8.46672e+07	-	-	-
CL577.Contig1_All	3.07084e+08	1.89175e+08	3.16573e+08	-	-	-
CL592.Contig2_All	6.87952e+07	3.65876e+07	7.84302e+07	K04043	ko03018	RNA degradation
CL6120.Contig1_All	160098532	6.97634e+07	5.17502e+07	-	-	-
CL6144.Contig3_All	6.85225e+07	1.192e+08	1.09514e+08	K08510	ko04130	SNARE interactions in vesicular transport
CL6278.Contig1_All	2.31691e+08	213383206	3.57265e+08	K02132	ko00190	Oxidative phosphorylation
CL6343.Contig1_All	7.82442e+07	8.07892e+07	9.41719e+07	-	-	-
CL6362.Contig3_All	1.16456e+08	4.87871e+07	8.66182e+07	K12741	ko03040	Spliceosome
CL642.Contig4_All	1.41428e+08	6.02278e+07	1.02775e+08	-	-	-
CL6662.Contig3_All	5.4711e+07	5.22843e+07	1.04298e+08	K06491	ko04514;ko05020	Cell adhesion molecules (CAMs);Prion diseases
CL6740.Contig1_All	5.8798e+07	4.40344e+07	7.09744e+07	K01940	ko01230;ko00250;ko00220	Biosynthesis of amino acids;Alanine, aspartate and glutamate metabolism;Arginine biosynthesis
CL6870.Contig3_All	5.06341e+07	7.64944e+07	6.34838e+07	-	-	-
CL7048.Contig1_All	8.59027e+07	5.78965e+07	5.75393e+07	-	-	-
CL7379.Contig3_All	5.15854e+07	3.70784e+07	7.63779e+07	-	-	-
CL7696.Contig5_All	9.81321e+07	7.47863e+07	8.3525e+07	K03231	ko03013	RNA transport
CL79.Contig2_All	1.43829e+08	1.573e+08	2.6559e+08	K00819	ko00330	Arginine and proline metabolism
CL7987.Contig8_All	2.76663e+08	8.56976e+07	2.39008e+08	K01476	ko01230;ko00220;ko00330	Biosynthesis of amino acids;Arginine biosynthesis;Arginine and proline metabolism
CL8183.Contig2_All	5.98413e+07	7.75233e+07	9.1093e+07	-	-	-
CL8486.Contig2_All	1.20474e+08	9.4733e+07	1.75613e+08	-	-	-
CL8917.Contig2_All	1.60562e+08	1.14013e+08	1.17759e+08	-	-	-
CL8917.Contig3_All	9.14527e+07	3.89071e+07	9.11752e+07	-	-	-
CL907.Contig1_All	5.30062e+07	7.28617e+07	8.07522e+07	K01623	ko01200;ko01230;ko00010;ko00030;ko00051	Carbon metabolism;Biosynthesis of amino acids;Glycolysis / Gluconeogenesis;Pentose phosphate pathway;Fructose and mannose metabolism
CL9216.Contig5_All	5.2613e+07	7.07624e+07	7.70502e+07	-	-	-
CL9437.Contig1_All	1.03197e+08	1.10635e+08	110906592	-	-	-
CL959.Contig8_All	1.2097e+08	1.48025e+08	1.61254e+08	-	-	-
CL9616.Contig2_All	1.70797e+08	124775663	1.12108e+08	K04565	ko04146	Peroxisome
CL9685.Contig1_All	3.17928e+08	1.7348e+08	1.53384e+08	-	-	-
CL9817.Contig5_All	1.12573e+08	6.42141e+07	7.93034e+07	K12741	ko03040	Spliceosome
Unigene10245_All	1.58654e+08	2.08398e+08	3.36593e+08	-	-	-
Unigene10574_All	9.14437e+07	8.73877e+07	1.12558e+08	-	-	-
Unigene1076_All	7.78639e+07	5.86377e+07	9.12687e+07	K14085	ko01230;ko00010;ko00053;ko00620;ko00071;ko00561;ko00260;ko00280;ko00300;ko00310;ko00330;ko00340;ko00380;ko00410	Biosynthesis of amino acids;Glycolysis / Gluconeogenesis;Ascorbate and aldarate metabolism;Pyruvate metabolism;Fatty acid degradation;Glycerolipid metabolism;Glycine, serine and threonine metabolism;Valine, leucine and isoleucine degradation;Lysine biosynthesis;Lysine degradation;Arginine and proline metabolism;Histidine metabolism;Tryptophan metabolism;beta-Alanine metabolism
Unigene11037_All	8.68781e+07	4.87011e+07	4.88569e+07	-	-	-
Unigene12040_All	3.39889e+08	6.59076e+07	496599580	K19719	ko04512	ECM-receptor interaction
Unigene12488_All	5.44656e+07	7.89594e+07	8.74085e+07	K00760	ko00230;ko00983	Purine metabolism;Drug metabolism - other enzymes
Unigene12583_All	6.27533e+08	8.46628e+08	2.90656e+08	K04565	ko04146	Peroxisome
Unigene13010_All	1.83695e+08	1.54854e+08	1.00997e+08	K05692	ko04145	Phagosome
Unigene13609_All	1.23418e+08	1.51709e+08	2.52571e+08	K15040	ko04020;ko04216;ko04621	Calcium signaling pathway;Ferroptosis;NOD-like receptor signaling pathway
Unigene138_All	6.75068e+08	3.70314e+08	7.5053e+08	-	-	-
Unigene13887_All	5.73248e+07	1.07283e+08	1.65252e+08	K00873	ko01200;ko01230;ko00010;ko00620;ko00230	Carbon metabolism;Biosynthesis of amino acids;Glycolysis / Gluconeogenesis;Pyruvate metabolism;Purine metabolism
Unigene15624_All	5.06657e+07	5.96943e+07	7.98367e+07	-	-	-
Unigene17007_All	6.3459e+07	4.5391e+07	5.33906e+07	-	-	-
Unigene19474_All	3.52459e+08	1.45102e+08	2.80314e+08	-	-	-
Unigene19491_All	6.47502e+07	4.5236e+07	7.88801e+07	-	-	-
Unigene23362_All	1.10441e+08	127062702	2.14469e+08	K07375	ko04145	Phagosome
Unigene23802_All	1.3361e+08	114130099	117201109	-	-	-
Unigene23830_All	1.61565e+08	1.00464e+08	1.41751e+08	-	-	-
Unigene26626_All	3.73745e+08	482121705	8.19403e+08	K11252	ko05203;ko05322;ko05034	Viral carcinogenesis;Systemic lupus erythematosus;Alcoholism
Unigene27590_All	5.81967e+08	1.01553e+08	1.97759e+08	-	-	-
Unigene27643_All	5.76189e+07	3.93027e+07	5.09538e+07	K00615	ko01200;ko01230;ko00030;ko00900	Carbon metabolism;Biosynthesis of amino acids;Pentose phosphate pathway;Terpenoid backbone biosynthesis
Unigene27905_All	5.41983e+07	4.41262e+07	7.11163e+07	K14455	ko01200;ko01210;ko01230;ko00250;ko00270;ko00220;ko00330;ko00350;ko00360;ko00400	Carbon metabolism;2-Oxocarboxylic acid metabolism;Biosynthesis of amino acids;Alanine, aspartate and glutamate metabolism;Cysteine and methionine metabolism;Arginine biosynthesis;Arginine and proline metabolism;Tyrosine metabolism;Phenylalanine metabolism;Phenylalanine, tyrosine and tryptophan biosynthesis
Unigene28019_All	1.34696e+08	1.31654e+08	1.04049e+08	-	-	-
Unigene31286_All	7.9526e+08	4.26891e+08	5.03291e+08	K02977	ko03010	Ribosome
Unigene31853_All	7.24589e+07	4.86547e+07	4.92986e+07	-	-	-
Unigene32191_All	1.39719e+08	146587694	2.1352e+08	K00026	ko01200;ko00020;ko00620;ko00630;ko00270	Carbon metabolism;Citrate cycle (TCA cycle);Pyruvate metabolism;Glyoxylate and dicarboxylate metabolism;Cysteine and methionine metabolism
Unigene32272_All	4.36739e+08	3.10299e+08	2.57693e+08	-	-	-
Unigene35944_All	6.08016e+07	9.28475e+07	7.98172e+07	K01915	ko01230;ko00630;ko00910;ko00250;ko00220	Biosynthesis of amino acids;Glyoxylate and dicarboxylate metabolism;Nitrogen metabolism;Alanine, aspartate and glutamate metabolism;Arginine biosynthesis
Unigene36242_All	8.62292e+07	4.61428e+07	4.36506e+07	-	-	-
Unigene36494_All	5.96027e+07	5.14771e+07	8.18164e+07	K07249	ko00830	Retinol metabolism
Unigene36609_All	2.74223e+08	1.24715e+08	2.0861e+08	K13279	ko04146	Peroxisome
Unigene37214_All	2.46111e+08	1.62522e+08	1.38547e+08	K02183	ko04014;ko04015;ko04371;ko04020;ko04070;ko04024;ko04022;ko04114;ko04910;ko04922;ko04912;ko04915;ko04921;ko04916;ko04924;ko04925;ko04261;ko04270;ko04970;ko04971;ko04728;ko04720;ko04722;ko04744;ko04740;ko04750;ko04713;ko05214;ko05010;ko05031;ko05034;ko05418;ko05133;ko05152	Ras signaling pathway;Rap1 signaling pathway;Apelin signaling pathway;Calcium signaling pathway;Phosphatidylinositol signaling system;cAMP signaling pathway;cGMP - PKG signaling pathway;Oocyte meiosis;Insulin signaling pathway;Glucagon signaling pathway;GnRH signaling pathway;Estrogen signaling pathway;Oxytocin signaling pathway;Melanogenesis;Renin secretion;Aldosterone synthesis and secretion;Ad…
Unigene38116_All	100411695	132115451	1.44596e+08	K01803	ko01200;ko01230;ko00010;ko00051;ko00562	Carbon metabolism;Biosynthesis of amino acids;Glycolysis / Gluconeogenesis;Fructose and mannose metabolism;Inositol phosphate metabolism
Unigene40740_All	7.74032e+07	3.84314e+07	6.3116e+07	K04077	ko03018	RNA degradation
Unigene40965_All	1.23772e+08	1.00716e+08	1.1446e+08	K01803	ko01200;ko01230;ko00010;ko00051;ko00562	Carbon metabolism;Biosynthesis of amino acids;Glycolysis / Gluconeogenesis;Fructose and mannose metabolism;Inositol phosphate metabolism
Unigene44174_All	7.56318e+08	1650588924	4.37387e+08	-	-	-
Unigene44175_All	2686839235	4207578204	1447759684	-	-	-
Unigene44176_All	1546719625	2976828697	8.33534e+08	-	-	-
Unigene44177_All	4.37755e+08	8.74377e+08	2.49517e+08	-	-	-
Unigene44178_All	4.074e+08	248148386	1.37251e+08	-	-	-
Unigene45194_All	5.92192e+08	3.66347e+08	5.0472e+08	-	-	-
Unigene46941_All	1040193658	8.7589e+07	1452948391	K06236	ko04512;ko04933	ECM-receptor interaction;AGE-RAGE signaling pathway in diabetic complications
Unigene4718_All	4.72564e+08	1151541910	2.41374e+08	-	-	-
Unigene48594_All	1.05199e+08	5.4904e+07	4.70071e+07	-	-	-
Unigene49346_All	2.6581e+08	1.97746e+08	3.29535e+08	-	-	-
Unigene5932_All	1.13141e+08	6.44971e+07	5.46507e+07	-	-	-
Unigene6208_All	1.20832e+08	1.7719e+08	5.06687e+08	-	-	-
Unigene6346_All	1.09642e+08	1.04593e+08	159086022	K00031	ko01200;ko01210;ko01230;ko00020;ko00480;ko04146	Carbon metabolism;2-Oxocarboxylic acid metabolism;Biosynthesis of amino acids;Citrate cycle (TCA cycle);Glutathione metabolism;Peroxisome
Unigene6524_All	1.9463e+08	1.50153e+08	2.18068e+08	-	-	-
Unigene7405_All	1.09146e+08	1.26923e+08	1.51302e+08	K06630	ko04391	Hippo signaling pathway -fly
Unigene74527_All	8.57215e+07	6.11597e+07	1.02788e+08	-	-	-
Unigene7884_All	7.0084e+07	4.07065e+07	6.55636e+07	-	-	-
Unigene8549_All	1.35724e+08	9.42487e+07	8.51962e+07	-	-	-
Unigene8853_All	2.57576e+08	2.88567e+08	3.09685e+08	-	-	-
Unigene9615_All	1.85043e+08	2.72303e+08	3.20975e+08	K07375	ko04145	Phagosome
Unigene971_All	2.00385e+08	1.80854e+08	1.88131e+08	K01689	ko01200;ko01230;ko00010;ko03018	Carbon metabolism;Biosynthesis of amino acids;Glycolysis / Gluconeogenesis;RNA degradation
