# Supplementary material for: Proteomic analysis of the spineless cuttlefish Sepiella japonica: exploratory analyses on the phenomenon of death after spawning
Source: Research Square preprint supplement (doi:10.21203/rs.3.rs-155588/v2), 2022-04-29
Supplement: Supplementary file 2 [file e4318486f3e9f251eed5dca0.xlsx]

## Sheet: Sheet1
Table S4 DEPs involved in aging-related pathways
Signaling pathway	Accession	Coverage	Peptides	pI	Score	Description	A ave.	B ave.	C ave.	B vs A_FC	P-value	B vs C_FC	P-value	C vs A_FC	P-value
cGMP - PKG signaling pathway	Unigene37214_All	38.0952	9	4.3	150.77	CALM2 (Calmodulin and related proteins, EF-Hand superfamily)	2.46111e+08	1.62522e+08	1.38547e+08	0.660362	0.0288099	1.17305	0.45635	0.562944	0.0211866
	Unigene24770_All	18.0662	6	5.66	62.82	ATP1A (Na+/K+ ATPase, alpha subunit)	1.3262e+07	NA	NA	NA	NA	NA	NA	NA	NA
	Unigene41788_All	12.0743	4	9.89	30.96	SLC25A4S (Mitochondrial ADP/ATP carrier proteins)	1.81625e+07	NA	NA	NA	NA	NA	NA	NA	NA
Wnt signaling pathway	CL9681.Contig4_All	33.9713	6	5.58	109.29	RhoA (Ras-related small GTPase, Rho type)	1.03886e+07	1.00955e+07	2.25004e+07	0.971781	0.652132	0.448678	0.0187013	2.16588	0.0203344
	CL2492.Contig2_All	25.5208	4	8.25	13.52	RAC1 (Ras-related small GTPase, Rho type)	NA	1.22539e+07	1.49683e+07	NA	NA	0.818656	0.495861	NA	NA
	CL3914.Contig4_All	21.8876	11	6.15	68.65	PPP3C (Serine-threonine phosphatase 2B, catalytic subunit)	9.58243e+06	1.73757e+07	1.91209e+07	1.81329	0.0230565	0.908729	0.38891	1.99542	0.00666988
	Unigene31304_All	25	13	8.29	66.71	CAMK2 (Ca2+/calmodulin-dependent protein kinase, EF-Hand protein superfamily)	9.81801e+06	5.00879e+06	1.98414e+07	0.510164	NA	0.252441	NA	2.02092	NA
	CL5711.Contig3_All	12.8289	15	6.16	37.71	PLCB (Phospholipase C)	2.79826e+06	7.46409e+06	8.61777e+06	2.6674	0.0025143	0.866127	0.169573	3.07969	0.000112672
	Unigene36659_All	10.4072	2	6.96	15.76	CACYBP (Calcyclin-binding protein CacyBP)	5.511e+06	2.86629e+06	4.43511e+06	0.520103	0.046301	0.646272	0.032517	0.804774	0.15514
	Unigene35601_All	16.0494	3	4.5	14.47	SKP1 (SCF ubiquitin ligase, Skp1 component)	NA	6.29152e+06	8.99733e+06	NA	NA	0.699265	0.0882773	NA	NA
	CL3933.Contig2_All	7.03125	2	7.96	4.04	CSNK2A (Casein kinase II, alpha subunit)	NA	2.70309e+06	3.37724e+06	NA	NA	0.800385	NA	NA	NA
MAPK signaling pathway	CL3329.Contig1_All	22.6727	15	5.59	369.9	HSPA1s (Molecular chaperones HSP70 / HSC70, HSP70 superfamily)	4.08437e+06	NA	NA	NA	NA	NA	NA	NA	NA
	CL7765.Contig1_All	32.2581	6	7.06	51.13	Rap1A (Ras-related GTPase)	1.27921e+07	1.65958e+07	2.34127e+07	1.29735	0.0559536	0.708838	0.0502422	1.83024	0.0148489
	CL8267.Contig1_All	16.1585	4	9.8	16.07	FGFR4 (fibroblast growth factor receptor 4)	4.52902e+06	3.95474e+06	5.6884e+06	0.873201	NA	0.695229	NA	1.25599	0.491626
PI3K-Akt signaling pathway	CL4592.Contig1_All	9.05459	6	5.1	110.66	HSP90AB1 (Molecular chaperone, HSP90 family)	1.02207e+07	NA	NA	NA	NA	NA	NA	NA	NA
	CL4592.Contig2_All	8.93855	3	5.21	23.49	HSP90AA1 (Molecular chaperone, HSP90 family)	1.50834e+06	NA	NA	NA	NA	NA	NA	NA	NA
	Unigene46794_All	10.6007	3	4.87	41.31	YWHAE (Multifunctional chaperone, 14-3-3 family)	1.51321e+06	NA	NA	NA	NA	NA	NA	NA	NA
	CL6624.Contig1_All	8.23529	3	6	33.57	GNB1 (guanine nucleotide-binding protein, beta-1 subunit)	5.9536e+06	1.06764e+07	1.0033e+07	1.79326	NA	1.06413	0.633393	1.68519	NA
mTOR signaling pathway	CL5602.Contig1_All	42.7642	24	5.41	189.34	ATPeV1A (Vacuolar H+-ATPase V1 sector, subunit A)	2.87318e+07	4.40013e+07	4.17318e+07	1.53145	0.00516535	1.05438	0.535558	1.45246	0.00279937
	CL8849.Contig2_All	32.3413	11	5.34	159.84	ATPeV1B (Vacuolar H+-ATPase V1 sector, subunit B)	4.5386e+07	4.81859e+07	5.10403e+07	1.06169	0.279072	0.944076	0.259547	1.12458	0.0121353
	CL9124.Contig2_All	8.90688	2	9.52	9.1	ATPeV1D (Vacuolar H+-ATPase V1 sector, subunit D)	NA	3.47812e+06	3.27575e+06	NA	NA	1.06178	0.87194	NA	NA
	CL9667.Contig1_All	26.1062	8	9.03	39.04	ATPeV1E (Vacuolar H+-ATPase V1 sector, subunit E)	1.24458e+07	2.20524e+07	1.89493e+07	1.77187	0.00130695	1.16376	0.0377411	1.52254	0.00956395
	Unigene23475_All	37.6068	4	9.39	55.64	ATPeV1G (Vacuolar H+-ATPase V1 sector, subunit G)	2.31018e+07	2.57372e+07	1.67488e+07	1.11408	0.622063	1.53665	0.0170738	0.725001	0.263184
	CL5304.Contig1_All	19.9584	9	7.01	11.22	ATPeV1H (Vacuolar H+-ATPase V1 sector, subunit H)	3.37741e+06	7.91694e+06	6.47604e+06	2.34408	0.0219633	1.2225	0.175321	1.91745	0.0545502
	Unigene23535_All	11.8211	6	11.17	41.25	RPS6e (40S ribosomal protein S6)	2.42106e+07	1.20401e+07	1.78721e+07	0.497305	0.0208982	0.673682	0.0570305	0.73819	0.134636
	CL7416.Contig2_All	44.0909	8	6.65	32.61	GRB2 (Adaptor protein GRB2, contains SH2 and SH3 domains)	1.52086e+07	5.91317e+06	7.36909e+06	0.388804	0.000972207	0.802429	0.124238	0.484534	0.00161114
	CL5277.Contig1_All	20.5405	4	8.21	30.61	KRAS (Ras-related GTPase)	5.6242e+06	6.97501e+06	1.22638e+07	1.24018	0.0375944	0.568747	0.000255512	2.18055	9.99315e-05
	Unigene27405_All	17.8478	6	6.8	21.74	MAPK1_3 (Mitogen-activated protein kinase 1/3)	9.14926e+06	8.31498e+06	1.1265e+07	0.908815	0.623187	0.738122	0.0343403	1.23125	0.238801
	CL2209.Contig1_All	8.31234	4	6.02	16.1	MAP2K1 (Mitogen-activated protein kinase kinase)	8.55701e+06	6.33997e+06	1.23004e+07	0.74091	0.298222	0.515429	0.0335302	1.43746	0.127769
	CL3152.Contig2_All	13.9293	7	5.92	15.05	AKT (Serine/threonine protein kinase)	2.38211e+06	2.07434e+06	3.93747e+06	0.870799	0.514184	0.52682	0.00567311	1.65293	0.0470691
	Unigene19470_All	14.1479	4	6.16	12.68	SEC13 (protein transport protein SEC13)	1.70259e+07	7.06661e+06	1.01612e+07	0.41505	NA	0.695451	NA	0.596807	0.156553
	CL7440.Contig2_All	18.5012	5	8.56	8.85	GSK3B (glycogen synthase kinase 3 beta)	3.44095e+06	1.94746e+06	4.48269e+06	0.565967	NA	0.43444	NA	1.30275	0.401658
Lysosome	CL981.Contig4_All	29.8795	8	8.35	80.38	CTSD (Aspartyl protease)	5.24689e+07	2.79717e+07	4.37881e+07	0.53311	0.00617126	0.638796	0.0372535	0.834554	0.0668532
